# Supplementary material
Source: bioRxiv or medRxiv preprint supplement (http://medrxiv.stage.highwire.org/highwire/filestream/85296/field_highwire_adjunct_files/0/2020.06.09.20126938-1.pdf)
Supplement: Supplementary file [file 2020.06.09.20126938-1.pdf]

## ONLINE SUPPLEMENT

### **Association between use of aspirin use before hospital admission and sepsis outcomes: a population-based cohort study**

<sup>¶1</sup>Wan-Ting Hsu, MS, <sup>¶2</sup>Lorenzo Porta, MD, <sup>3</sup>Tzu-Chun Hsu, BS, <sup>3</sup>Shyr-Chyr Chen, MD, EMBA, <sup>\*3</sup>Chien-Chang Lee, MD, ScD.

<sup>1</sup> Department of Epidemiology, Harvard T.H. Chan School of Public Health, Boston, MA, USA

<sup>2</sup> School of Medicine and Surgery, Department of Emergency Medicine, Università degli studi di Milano Bicocca, Milan, Italy

<sup>3</sup>Department of Emergency Medicine, National Taiwan University Hospital, Taipei, Taiwan

<sup>¶</sup> **The two authors contribute equally to this work**

#### **\*Correspondence to:**

Chien-Chang Lee, MD, ScD

Health Data Science Research Group, National Taiwan University Hospital

Department of Emergency Medicine, National Taiwan University Hospital

No.7, Chung Shan S. Rd., Zhongzheng Dist., Taipei City 100, Taiwan.

Email: [hit3transparency@gmail.com](mailto:hit3transparency@gmail.com)/ [cclee100@gmail.com](mailto:cclee100@gmail.com) TEL: +886-2-2312-3456 ext. 63485

Supplementary eFigure 1. Standardized differences of covariates before and after propensity score matching for aspirin users vs. nonusers.

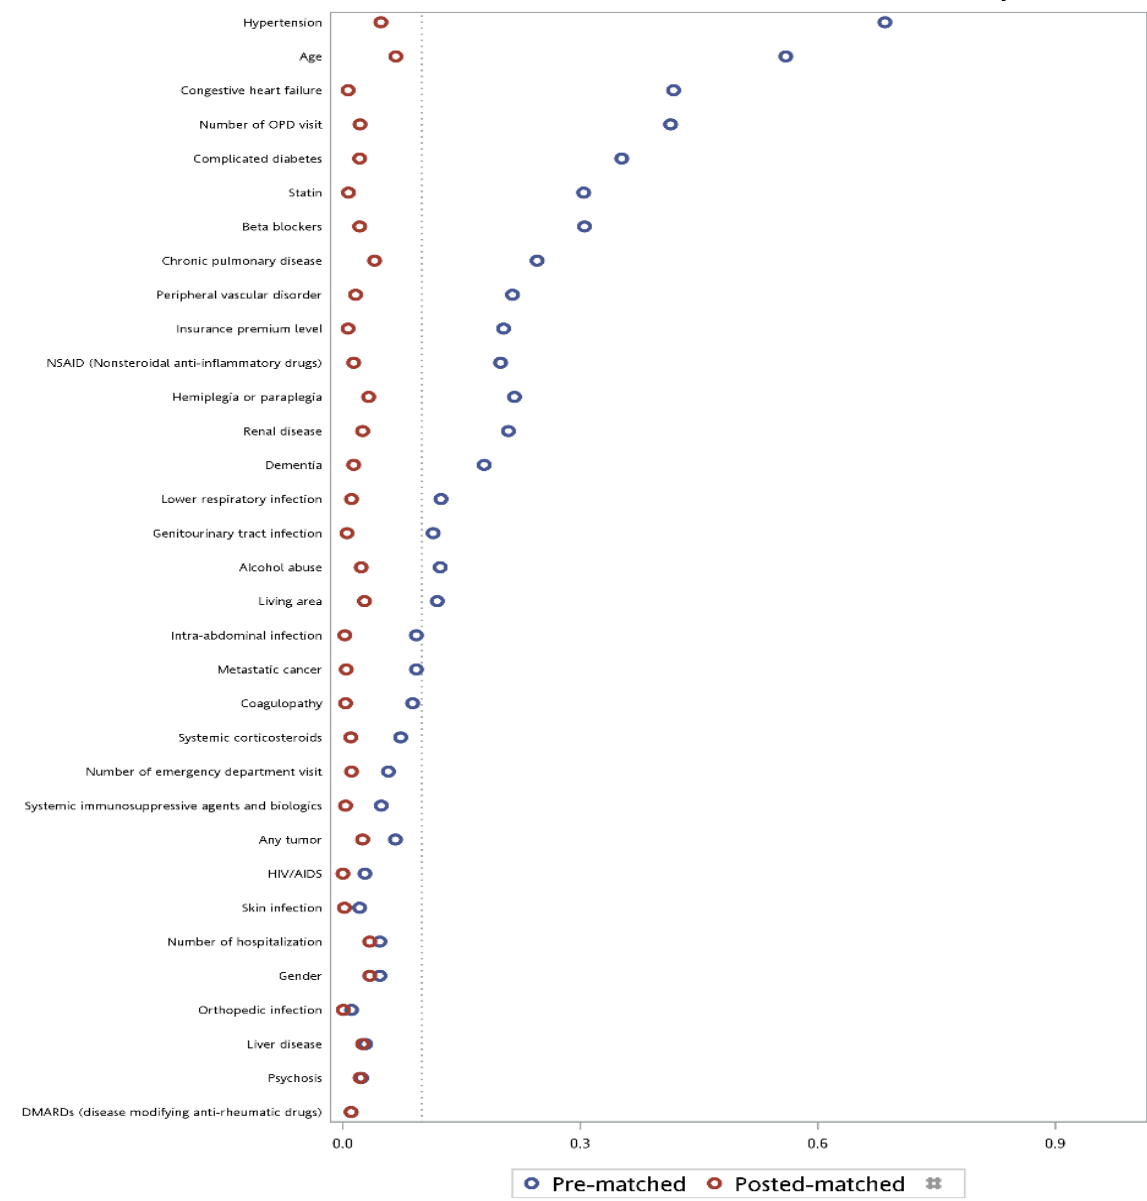

Supplementary eFigure 2. Process of inclusion and exclusion of sepsis patients

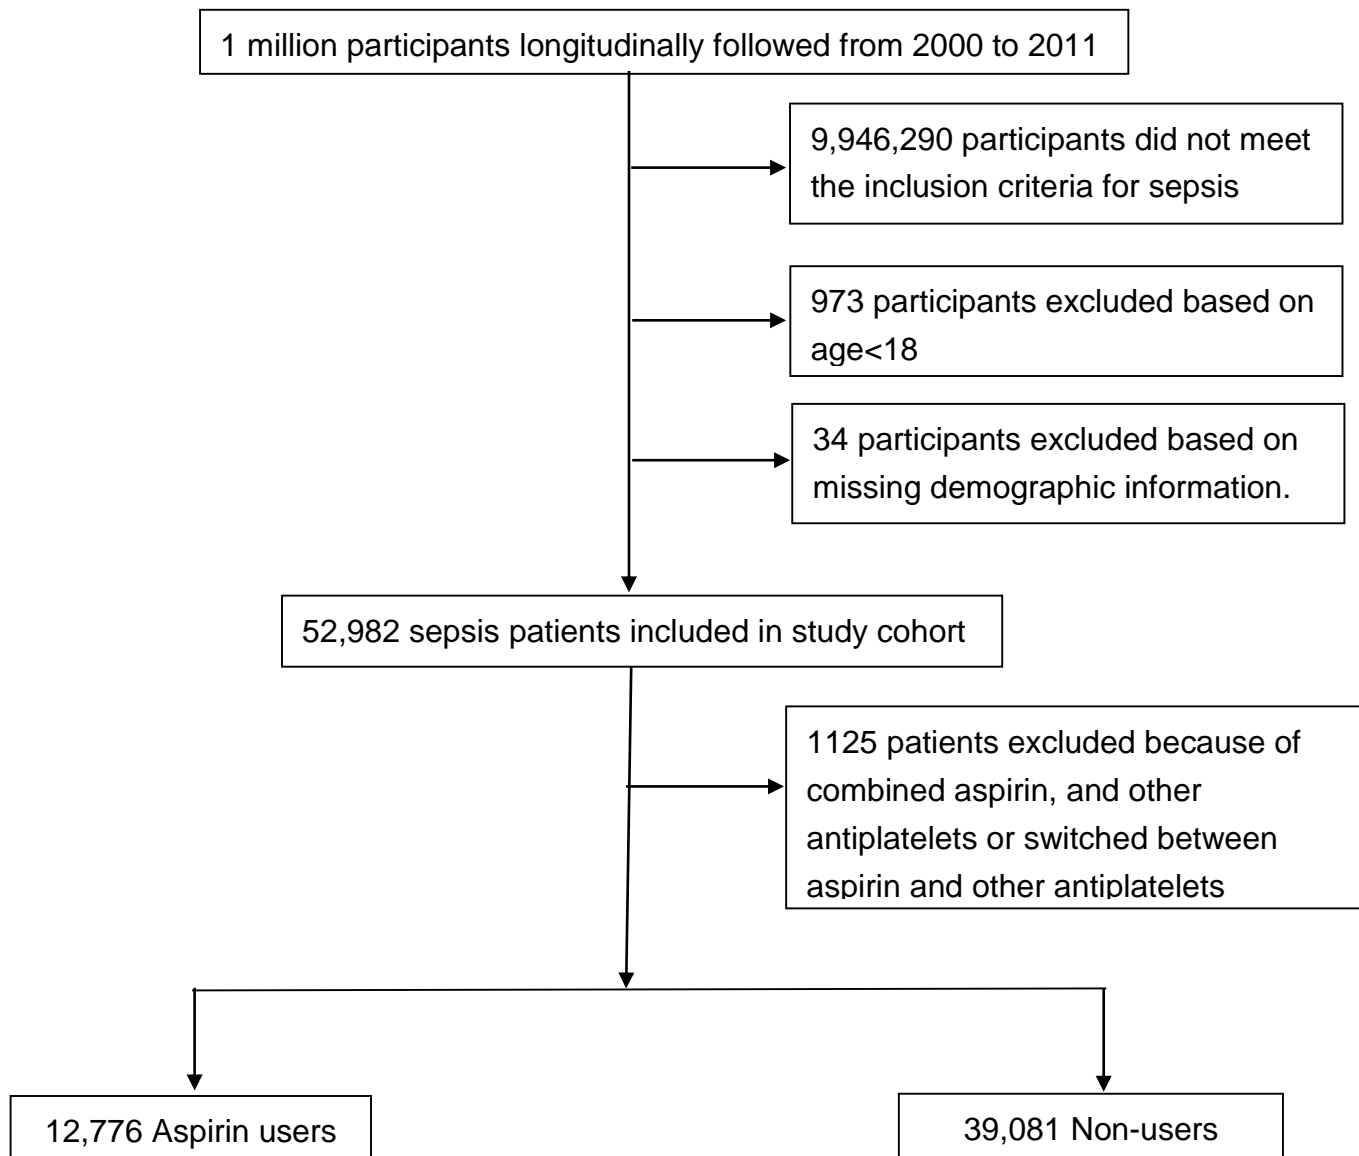

## **eAppendices**

eAppendix 1 : Codes associated with infection

eAppendix 2: Codes associated with organ dysfunction

### **eAppendix 1 : Codes associated with infection**

#### **Codes associated with infection**

##### **Gastrointestinal infection**

001, Cholera;  
002, Typhoid/paratyphoid fever;  
003, Other salmonella infection;  
004, Shigellosis;  
005 Other food poisoning;  
008, Intestinal infection not otherwise classified;  
009, Ill-defined intestinal infection;  
562.01, Diverticulitis of small intestine without hemorrhage;  
562.03, Diverticulitis of small intestine with hemorrhage;  
562.11, Diverticulitis of colon without hemorrhage;  
562.13, Diverticulitis of colon with hemorrhage;

##### **Tuberculosis**

010, Primary tuberculosis infection;  
011, Pulmonary tuberculosis;  
012, Other respiratory tuberculosis;  
013, Central nervous system tuberculosis;  
014, Intestinal tuberculosis; 015, Tuberculosis of bone and joint; 016, Genitourinary tuberculosis;  
017, Tuberculosis not otherwise classified;  
018, Miliary tuberculosis;

##### **Zoonosis**

020, Plague;  
021, Tularemia;  
022, Anthrax;  
023, Brucellosis;  
024, Glanders;

025, Melioidosis;  
026, Rat-bite fever;  
027, other bacterial zoonoses;

**Other mycobacterial disease**

030, Leprosy;  
031, Other mycobacterial disease;

**Syphilis**

090, Congenital syphilis;  
091, Early symptomatic syphilis;  
092, Early syphilis latent;  
093, Cardiovascular syphilis;  
094, Neurosyphilis;  
095, Other late symptomatic syphilis;  
096, Late syphilis latent;  
097, Other and unspecified syphilis;  
102, Yaws;  
103, Pinta;  
104, Other spirochetal infection;

**037, Tetanus;**

**Other bacterial diseases**

040, Other bacterial diseases;  
041, Bacterial infection in other diseases not otherwise specified;

**Systemic fungal infection**

110, Dermatophytosis;  
111, Dermatomycosis not otherwise classified or specified;  
112, Candidiasis;  
114, Coccidioidomycosis;  
115, Histoplasmosis;  
116, Blastomycotic infection;  
117, Other mycoses;  
118, Opportunistic mycoses;  
117.9 Disseminated fungal infection  
112.5, Disseminated candida infection

112.81, Disseminated fungal endocarditis  
039, Actinomycotic infections;

#### **CNS infection**

320, Bacterial meningitis;  
322, Meningitis, unspecified;  
324, Central nervous system abscess;  
325, Phlebitis of intracranial sinus;  
036, Meningococcal infection;

#### **Cardiovascular infection**

420, Acute pericarditis;  
421, Acute or subacute endocarditis;  
451, Thrombophlebitis;

#### **Upper respiratory tract infection**

461, Acute sinusitis;  
462, Acute pharyngitis;  
463, Acute tonsillitis;  
464, Acute laryngitis/ tracheitis;  
465, Acute upper respiratory infection of multiple sites/not otherwise specified;  
101, Vincent's angina;  
034, Streptococcal throat/scarlet fever;  
032, Diphtheria;

#### **Lower respiratory tract infection**

481, Pneumococcal pneumonia;  
482, Other bacterial pneumonia;  
485, Bronchopneumonia with organism not otherwise specified;  
486, Pneumonia, organism not otherwise specified;  
491.21, Acute exacerbation of obstructive chronic bronchitis;  
494, Bronchiectasis;  
510, Empyema;  
513, Lung/mediastinum abscess;  
033, Whooping cough;  
484 Pneumonia classified in elsewhere  
483 Pneumonia by other pathogens

#### **Intra-abdominal infection**

540, Acute appendicitis;  
541, Appendicitis not otherwise specified;  
542, Other appendicitis;  
566, Anal and rectal abscess;  
567, Peritonitis;  
569.5, Intestinal abscess;  
569.83, Perforation of intestine;  
572.0, Abscess of liver;

#### **Biliary tract infection**

572.1, Portal pyremia;  
575.0, Acute cholecystitis;

#### **Genitourinary tract infection**

590, Kidney infection;  
597, Urethritis/urethral syndrome;  
599.0, Urinary tract infection not otherwise specified;  
601, Prostatic inflammation;  
098, Gonococcal infections;

#### **Gynecological infection**

614, Female pelvic inflammation disease;  
615, Uterine inflammatory disease;  
616, Other female genital inflammation; 681, Cellulitis, finger/ toe;  
098, Gonococcal infections;

#### **Skin and appendix structure infection**

682, Other cellulitis or abscess;  
683, Acute lymphadenitis;  
686, Other local skin infection;  
035, Erysipelas;

#### **Musculoskeletal infection**

711.0, Pyogenic arthritis;  
730, Osteomyelitis; 790.7, Bacteremia;  
996.6, Infection or inflammation of device/graft;

#### **Post-operative complication**

998.5, Postoperative infection;

### **Nosocomial infection**

999.3, Infectious complication of medical care not otherwise classified.

### **Septicemia**

038.0, Streptococcal septicemia

038.1, Staphylococcal septicemia

038.2, Pneumococcal septicemia [Streptococcus pneumoniae septicemia]

038.3, Septicemia due to anaerobes, septicemia due to bacteroides

Excludes: gas gangrene (040.0)

that due to anaerobic streptococci (038.0)

038.4, Septicemia due to other gram-negative organisms

038.40, Gram-negative organism, unspecified, gram-negative septicemia NOS

038.41, Haemophilus influenzae [H. influenzae]

038.42, Escherichia coli [E. coli]

038.43, Pseudomonas

038.44, Serratia

038.49, Other

038.8, Other specified septicemias

Excludes: septicemia (due to): anthrax (022.3), gonococcal (098.89), herpetic (054.5), meningococcal (036.2), septicemic plague (020.2)

038.9, Unspecified septicemia

Excludes: bacteremia NOS (790.7)

995.92, Severe sepsis

790.7, Bacteremia



**eAppendix 2:** Codes associated with organ dysfunction

**Cardiovascular dysfunction/Shock**

Shock 785.5 or hypotension 458

**Acute respiratory failure**

Mechanical ventilation 96.7 or use of ventilator 57001B, 57002B, 57023B, 57029C

**Central nervous system dysfunction**

Neurologic Encephalopathy 348.3

Transient organic psychosis 293

Anoxic brain damage 348.1

**Hematologic system dysfunction**

Hematologic Secondary thrombocytopenia 287.4

Thrombocytopenia, unspecified 287.5

Other/unspecified coagulation defect 286.9

Defibrination syndrome 286.6

**Hepatic system dysfunction**

Hepatic Acute and subacute necrosis of liver 570

Hepatic encephalopathy 572.2

Hepatorenal syndrome 572,4

Other sequel of chronic liver disease 572.8

Hepatic infarction 573.4, 573.8

Liver replaced by transplant V42.7

**Renal system dysfunction**

Acute renal failure 584 or Use of CVVH (58014C)

**Metabolic system dysfunction**

Diabetic ketoacidosis 250.1

Hyperosmolar hyperglycemic state 250.2
